# Supplementary material for: An improved, low-cost, hydroponic system for growing Arabidopsis and other plant species under aseptic conditions
Source: PubMed Central journal article supplement (PMC3999955; doi:10.1186/1471-2229-14-69), 2014-03-21
Supplement: 1471-2229-14-69-S3.pdf [file 1471-2229-14-69-S3.pdf]

### Additional file 3. Differentially expressed genes by Pi depletion during short time points in Arabidopsis roots.

| UP-REGULATED GENES |                                                                                                                                                                                                                                                                 |                  |        |        |                                                             |  |
|--------------------|-----------------------------------------------------------------------------------------------------------------------------------------------------------------------------------------------------------------------------------------------------------------|------------------|--------|--------|-------------------------------------------------------------|--|
| ID (array)         | Description                                                                                                                                                                                                                                                     | Expression ratio |        |        | Biological process involved                                 |  |
|                    |                                                                                                                                                                                                                                                                 | 10 min           | 30 min | 2 h    |                                                             |  |
| <b>Group I</b>     |                                                                                                                                                                                                                                                                 |                  |        |        |                                                             |  |
|                    | FAD-binding domain-containing protein similar to SP P30986 reticuline oxidase precursor (Berberine-bridge-forming enzyme) (BBE) (Tetrahydroprotoberberine synthase) [Eschscholzia californica]; contains PF01565 FAD binding domain                             | 2.0571           | 1.0405 | 1.2171 | Oxidation-reduction process                                 |  |
| At1g01980          | Subtilase family protein similar to subtilisin-type protease precursor GI:14150446 from [Glycine max]                                                                                                                                                           | 2.2412           | 1.1103 | 0.9798 | Proteolysis, Defense-related gene (rice)                    |  |
| At1g20150          | CCAAT-box binding transcription factor (LEC1) similar to CAAT-box DNA binding protein subunit B (NF-YB) (SP:P25209) (GI:22380) [Zea mays]; identical to GB:AAC39488 GI:3282674 from [Arabidopsis thaliana] (Cell 93 (7), 1195-1205 (1998)); identified in Plant | 2.0464           | 1.0286 | 1.0259 | ABA-mediated signaling pathway                              |  |
| At1g56660          | Expressed protein                                                                                                                                                                                                                                               | 2.0959           | 0.9956 | 1.0881 | ---                                                         |  |
| At1g62000          | Expressed protein                                                                                                                                                                                                                                               | 2.1127           | 1.6064 | 0.9992 | ---                                                         |  |
| At1g64100          | Pentatricopeptide (PPR) repeat-containing protein contains Pfam profile PF01535: PPR repeat                                                                                                                                                                     | 4.2749           | 1.1753 | 1.2082 | Transcription                                               |  |
| At1g66250          | Glycosyl hydrolase family 17 protein similar to beta-1,3-glucanase GI:15150341 from [Camellia sinensis]                                                                                                                                                         | 2.122            | 1.0356 | 1.3966 | Cell wall metabolism                                        |  |
| At1g66450          | DC1 domain-containing protein contains Pfam profile PF03107: DC1 domain                                                                                                                                                                                         | 2.0199           | 1.2472 | 0.9931 | Oxidation-reduction process, Cytokinin biosynthetic pathway |  |
| At1g68790          | Expressed protein                                                                                                                                                                                                                                               | 2.045            | 1.3335 | 1.0114 | Microtubule cytoskeleton organization                       |  |
| At2g22610          | Kinesin motor protein-related                                                                                                                                                                                                                                   | 2.6697           | 1.3129 | 1.3415 | Microtubule cytoskeleton organization                       |  |
| At2g22795          | Expressed protein                                                                                                                                                                                                                                               | 2.3468           | 1.0586 | 0.9482 | ---                                                         |  |
| At2g29890          | Villin 1 (VLN1) nearly identical to villin 1 (VLN1) [Arabidopsis thaliana] GI:3415113                                                                                                                                                                           | 2.9965           | 1.4006 | 0.9295 | Cell expansion                                              |  |
| At3g05440          | C2 domain-containing protein similar to cold-regulated gene SRC2 [Glycine max] GI:2055230; contains Pfam profile PF00168: C2 domain                                                                                                                             | 2.1089           | 1.286  | 0.9741 | Response to cold (soybean)                                  |  |
| At3g05900          | Neurofilament protein-related similar to NF-180 (GI:632549) [Petromyza marinus] similar to Neurofilament triplet H protein (200 kda neurofilament protein) (Neurofilament heavy polypeptide) (NF-H) (Swiss-Prot:P12036) [Homo sapiens]                          | 2.1615           | 1.094  | 1.2476 | Cell wall metabolism                                        |  |
| At3g18120          | F-box family protein-related contains TIGRFAM TIGR01640 : F-box protein interaction domain; similar to F-box protein family, atfbx9 (GI:20197985) [Arabidopsis thaliana]                                                                                        | 3.1488           | 1.0907 | 1.0364 | Ubiquitination                                              |  |
| At3g28580          | AAA-type ATPase family protein contains Pfam profile: ATPase family PF00004                                                                                                                                                                                     | 2.327            | 1.0655 | 1.0595 | Response to ABA and ethylene                                |  |
| At4g25210          | Expressed protein weak similarity to storekeeper protein [Solanum tuberosum] GI:14268476; contains Pfam profile PF04504: Protein of unknown function, DUF573                                                                                                    | 2.5187           | 0.9301 | 0.9193 | Transcription                                               |  |
| At4g31660          | Transcriptional factor B3 family protein low similarity to reproductive meristem gene 1 from [Brassica oleracea var. Botrytis] GI:3170424; contains Pfam profile PF02362: B3 DNA binding domain                                                                 | 2.0743           | 0.9575 | 1.0684 | ---                                                         |  |

|                  |                                                                                                                                                                                                                                                                 |        |        |        |                                                                |
|------------------|-----------------------------------------------------------------------------------------------------------------------------------------------------------------------------------------------------------------------------------------------------------------|--------|--------|--------|----------------------------------------------------------------|
| At5g15620        | F-box family protein contains F-box domain Pfam:PF00646                                                                                                                                                                                                         | 3.5662 | 1.2191 | 1.0718 | Response to water stress                                       |
| At5g17260        | No apical meristem (NAM) family protein contains Pfam PF02365: No apical meristem (NAM) domain;                                                                                                                                                                 | 2.1029 | 0.7698 | 0.8915 | Transcription                                                  |
| At5g21970        | Expressed protein supported by full-length cDNA gi:22531216 from [Arabidopsis thaliana]                                                                                                                                                                         | 2.1253 | 1.0059 | 0.7792 | Ubiquitination                                                 |
| At5g23960        | Terpene synthase/cyclase family protein non-consensus TA donor splice site at exon 4                                                                                                                                                                            | 2.2779 | 1.3361 | 1.1005 | Response to herbivore and bacteria, sesquiterpene biosynthesis |
| At5g38720        | Expressed protein predicted protein, Drosophila melanogaster                                                                                                                                                                                                    | 2.2148 | 1.1651 | 0.8386 | ---                                                            |
| At5g40450        | Expressed protein                                                                                                                                                                                                                                               | 3.2814 | 1.4503 | 1.26   | Flavonoid biosynthesis                                         |
| At5g55660        | Expressed protein similar to unknown protein (pir  T08929)                                                                                                                                                                                                      | 2.2227 | 0.9991 | 1.0339 | ---                                                            |
| At5g60630        | Expressed protein predicted protein, Arabidopsis thaliana                                                                                                                                                                                                       | 2.2148 | 1.1565 | 0.9995 | ---                                                            |
| At5g63550        | Expressed protein                                                                                                                                                                                                                                               | 2.0248 | 0.9768 | 1.1095 | ---                                                            |
| <b>Group II</b>  |                                                                                                                                                                                                                                                                 |        |        |        |                                                                |
| At3g22120        | Protease inhibitor/seed storage/lipid transfer protein (LTP) family protein similar to SP Q00451 PRF1_LYCES 36.4 kDa proline-rich protein Lycopersicon esculentum, proline-rich cell wall protein [Medicago sativa] GI:3818416; contains Pfam profile PF00234 P | 2.145  | 2.2295 | 0.7955 | Cell wall metabolism                                           |
| At1g77120        | Alcohol dehydrogenase (ADH) identical to alcohol dehydrogenase GI:469467 from (Arabidopsis thaliana)                                                                                                                                                            | 2.1016 | 2.2782 | 0.9848 | Cell respiration, oxidation-reduction process                  |
| <b>Group III</b> |                                                                                                                                                                                                                                                                 |        |        |        |                                                                |
| At5g10040        | Expressed protein                                                                                                                                                                                                                                               | 2.4727 | 2.9128 | 2.9882 | Cell respiration, SA-mediated signaling pathway                |
| At2g14247        | Expressed protein                                                                                                                                                                                                                                               | 2.2689 | 1.6019 | 2.6504 | ---                                                            |
| <b>Group IV</b>  |                                                                                                                                                                                                                                                                 |        |        |        |                                                                |
| At1g04540        | C2 domain-containing protein low similarity to cold-regulated gene SRC2 [Glycine max] GI:2055230; contains Pfam profile PF00168: C2 domain                                                                                                                      | 1.2372 | 2.1895 | 1.3655 | ---                                                            |
| At1g07610        | Metallothionein-like protein 1C (MT-1C) identical to Metallothionein-like protein 1C (MT-1C). (SP:Q38804) (Arabidopsis thaliana)                                                                                                                                | 0.9576 | 2.205  | 0.7919 | Ion transport                                                  |
| At1g43260        | Hypothetical protein contains Pfam domain, PF04937: Protein of unknown function (DUF 659)                                                                                                                                                                       | 0.9113 | 2.1256 | 1.3626 | Transposon                                                     |
| At1g61520        | Chlorophyll A-B binding protein / LHCl type III (LHCA3.1) nearly identical to PSI type III chlorophyll a/b-binding protein GI:430947; contains Pfam profile: PF00504 chlorophyll A-B binding protein; similar to PSI type III chlorophyll a/b-binding protein G | 1.4043 | 2.3291 | 0.8539 | Photosynthesis                                                 |
| At2g04135        | Hypothetical protein                                                                                                                                                                                                                                            | 1.0158 | 2.8943 | 0.8432 | ---                                                            |
| At2g12280        | Ligase, putative identical to residues 550 - 623 of 10-formyltetrahydrofolate synthetase (Formate-tetrahydrofolate ligase (EC 6.3.4.3)) from Arabidopsis thaliana GI:5921663                                                                                    | 1.1024 | 2.0946 | 0.5998 | Folic acid metabolism                                          |
| At2g25200        | Expressed protein                                                                                                                                                                                                                                               | 0.822  | 2.0942 | 1.116  | ---                                                            |
| At2g28860        | Cytochrome P450 family protein similar to Cytochrome P450 61 (C-22 sterol desaturase) (SP:P54781) {Saccharomyces cerevisiae}                                                                                                                                    | 1.0938 | 2.4151 | 0.5886 | Oxidation-reduction process                                    |
| At2g39730        | Ribulose biphosphate carboxylase/oxygenase activase / rubisco activase identical                                                                                                                                                                                | 1.4878 | 2.5154 | 1.2095 | Photosynthesis                                                 |

|                 |                                                                                                                                                                                                                                                                                         |        |        |        |                                                                     |
|-----------------|-----------------------------------------------------------------------------------------------------------------------------------------------------------------------------------------------------------------------------------------------------------------------------------------|--------|--------|--------|---------------------------------------------------------------------|
| At3g03847       | to SWISS-PROT:P10896 ribulose biphosphate carboxylase/oxygenase activase, chloroplast precursor (rubisco activase, RA)[ <i>Arabidopsis thaliana</i> ]<br>Auxin-responsive family protein similar to auxin-inducible SAUR (Small Auxin Up rnas) (GI:3043536) [ <i>Raphanus sativus</i> ] | 0.9949 | 2.4934 | 0.9264 | Response to auxin stimulus                                          |
| At3g12580       | Heat shock protein 70, putative / HSP70, putative strong similarity to heat shock protein GI:425194 [ <i>Spinacia oleracea</i> ]                                                                                                                                                        | 0.9796 | 3.261  | 0.5339 | Protein metabolism, ion transport, response to bacteria and heat    |
| At3g21890       | Zinc finger (B-box type) family protein contains Pfam profile: PF01760 CONSTANS family zinc finger                                                                                                                                                                                      | 0.7663 | 2.2384 | 0.7268 | Transcription, response to UV-B                                     |
| At3g55800       | Sedoheptulose-1,7-bisphosphatase, chloroplast / sedoheptulose-bisphosphatase identical to SPIP46283 Sedoheptulose-1,7-bisphosphatase, chloroplast precursor (EC 3.1.3.37) (Sedoheptulose-bisphosphatase) (SBPASE) (SED(1,7)P2ASE) [ <i>Arabidopsis thaliana</i> ]                       | 1.4279 | 2.4922 | 1.0561 | MAPK cascade, carbohydrate metabolism                               |
| At3g56290       | Expressed protein                                                                                                                                                                                                                                                                       | 1.0792 | 2.0388 | 1.171  | Transcription                                                       |
| At4g25440       | WD-40 repeat family protein / zfw1 protein (ZFW1) identical to zfw1 protein (GI:12057164) [ <i>Arabidopsis thaliana</i> ]                                                                                                                                                               | 1.0633 | 2.0549 | 1.2079 | Ion transport                                                       |
| At4g28750       | Photosystem I reaction center subunit IV, chloroplast, putative / PSI-E, putative (PSAE1) identical to SP Q9S831; similar to SP P12354 Photosystem I reaction center subunit IV, chloroplast precursor (PSI-E) ( <i>Spinacia oleracea</i> ); contains Pfam profile PF024                | 1.0074 | 2.3766 | 0.6277 | Photosynthesis                                                      |
| At4g37550       | Formamidase, putative / formamide amidohydrolase, putative similar to SP Q50228 Formamidase (EC 3.5.1.49) (Formamide amidohydrolase) ( <i>Methylophilus methylotrophus</i> ); contains Pfam profile PF03069: Acetamidase/Formamidase family                                             | 1.2817 | 2.025  | 0.8268 | ---                                                                 |
| At5g20150       | SPX (SYG1/Pho81/XPR1) domain-containing protein similar to PHO1 protein [ <i>Arabidopsis thaliana</i> ] GI:20069032; contains Pfam profile PF03105: SPX domain                                                                                                                          | 1.0305 | 3.79   | 1.2851 | Pi transport and signaling pathway                                  |
| At5g38420       | Ribulose biphosphate carboxylase small chain 2B / rubisco small subunit 2B (RBCS-2B) (ATS2B) identical to SP P10797 Ribulose biphosphate carboxylase small chain 2B, chloroplast precursor (EC 4.1.1.39) (rubisco small subunit 2B) [ <i>Arabidopsis thaliana</i> ]                     | 1.0316 | 2.2434 | 1.0168 | Photosynthesis                                                      |
| At5g42720       | Glycosyl hydrolase family 17 protein similar to glucan endo-1,3-beta-glucosidase precursor SP:P52409 from [ <i>Triticum aestivum</i> ]                                                                                                                                                  | 1.0865 | 2.0064 | 0.9299 | Carbohydrate metabolism                                             |
| At5g51190       | AP2 domain-containing transcription factor, putative contains similarity to ethylene responsive element binding factor                                                                                                                                                                  | 1.2517 | 2.048  | 0.9006 | Transcription, response to chitin, mechanical stimulus and wounding |
| At5g52640       | Heat shock protein 81-1 (HSP81-1) / heat shock protein 83 (HSP83) nearly identical to SP P27323 Heat shock protein 81-1 (HSP81-1) (Heat shock protein 83) [ <i>Arabidopsis thaliana</i> ]; contains Pfam profiles PF02518: ATPase, histidine kinase-, DNA gyrase B-, and                | 1.0446 | 2.7368 | 0.7718 | Protein metabolism, ion transport response to bacteria and heat     |
| <b>Group V</b>  |                                                                                                                                                                                                                                                                                         |        |        |        |                                                                     |
| At3g47420       | Glycerol-3-phosphate transporter, putative / glycerol 3-phosphate permease, putative similar to camp inducible 2 protein [ <i>Mus musculus</i> ] GI:4580997, glycerol-3-phosphate transporter (glycerol 3-phosphate permease) [ <i>Homo sapiens</i> ] GI:7543982; contains Pfam p       | 1.078  | 3.3258 | 2.8003 | Pi homeostasis                                                      |
| At5g42530       | Expressed protein                                                                                                                                                                                                                                                                       | 1.5563 | 3.9044 | 2.0844 | ---                                                                 |
| <b>Group VI</b> |                                                                                                                                                                                                                                                                                         |        |        |        |                                                                     |
| At1g02500       | S-adenosylmethionine synthetase 1 (SAM1) identical to S-adenosylmethionine                                                                                                                                                                                                              | 1.1695 | 1.4747 | 4.0156 | Ion transport, response to salt stress,                             |

|           |                                                                                                                                                                                                                                                                 |        |        |        |                                                                 |
|-----------|-----------------------------------------------------------------------------------------------------------------------------------------------------------------------------------------------------------------------------------------------------------------|--------|--------|--------|-----------------------------------------------------------------|
|           | synthetase 1 (Methionine adenosyltransferase 1, adomet synthetase 1) [Arabidopsis thaliana] SWISS-PROT:P23686                                                                                                                                                   |        |        |        | temperatura and wounding                                        |
| At1g14550 | Anionic peroxidase, putative similar to anionic peroxidase Gl:170202 from (Nicotiana sylvestris)                                                                                                                                                                | 0.9398 | 0.8465 | 2.2612 | Oxidative stress                                                |
| At1g21110 | O-methyltransferase, putative similar to Gl:2781394                                                                                                                                                                                                             | 1.0285 | 0.618  | 2.0757 | ---                                                             |
|           | Pentatricopeptide (PPR) repeat-containing protein contains Pfam profile PF01535: PPR repeat. Gene continues on the 3' end of BAC F19G10 gb AF000657 gene F19G10.21                                                                                              |        |        |        | ---                                                             |
| At1g22830 | T-complex protein 1 epsilon subunit, putative / TCP-1-epsilon, putative / chaperonin, putative identical to SWISS-PROT:O04450- T-complex protein 1, epsilon subunit (TCP-1-epsilon) [Arabidopsis thaliana]; strong similarity to SP P54411 T-complex protein 1, | 1.2866 | 1.1052 | 2.4555 | Protein metabolism, RNA processing                              |
| At1g24510 | Hypothetical protein                                                                                                                                                                                                                                            | 1.3295 | 0.9452 | 2.071  |                                                                 |
| At1g49930 | Ethylene-responsive element-binding factor 3 (ERF3) identical to SP O80339                                                                                                                                                                                      | 0.9694 | 1.4515 | 2.1928 | ---                                                             |
| At1g50640 | Ethylene responsive element binding factor 3 (aterf3) [Arabidopsis thaliana]                                                                                                                                                                                    | 1.0249 | 1.0753 | 2.1262 | Response to salt stress, ethylene                               |
|           | MATE efflux family protein similar to ripening regulated protein DDTFR18 [Lycopersicon esculentum] Gl:12231296; contains Pfam profile PF01554:                                                                                                                  |        |        |        | Drug transmembrane transport, response to ABA and JA            |
| At1g61890 | Uncharacterized membrane protein family                                                                                                                                                                                                                         | 1.3738 | 0.8671 | 2.1002 |                                                                 |
|           | Xyloglucan:xyloglucosyl transferase, putative / xyloglucan endotransglycosylase, putative / endo-xyloglucan transferase, putative similar to xyloglucan endotransglycosylase TCH4 Gl:886116 from [Arabidopsis thaliana]                                         |        |        |        | Carbohydrate metabolism                                         |
| At1g65310 | Zinc finger (C3HC4-type RING finger) family protein contains Pfam profile: PF00097:                                                                                                                                                                             | 0.8885 | 1.1198 | 2.1177 |                                                                 |
| At1g72200 | Zinc finger, C3HC4 type (RING finger)                                                                                                                                                                                                                           | 0.8005 | 1.042  | 2.0836 | Iron starvation, nitrate transport                              |
|           | Curculin-like (mannose-binding) lectin family protein similar to S glycoprotein [Brassica rapa] Gl:2351186; contains Pfam profile PF01453: Lectin (probable mannose binding)                                                                                    |        |        |        | Sugar binding                                                   |
| At1g78830 | Phosphoribulokinase/uridine kinase-related                                                                                                                                                                                                                      | 0.845  | 1.1101 | 2.0994 |                                                                 |
| At1g80380 | 1,2-diacylglycerol 3-beta-galactosyltransferase, putative / monogalactosyldiacylglycerol synthase, putative / MGDG synthase, putative identical to monogalactosyldiacylglycerol synthase type C [gi:9927295] from Arabidopsis thaliana, similar to MGDG synthas | 0.9276 | 0.5884 | 2.1529 | Photorespiration<br>Cellular response to Pi starvation          |
| At2g11810 | AAA-type ATPase family protein / vacuolar sorting protein-related similar to SP P46467 SKD1 protein (Vacuolar sorting protein 4b) (Mus musculus); contains Pfam profiles PF00004: ATPase AAA family, PF04212: MIT domain                                        | 0.7615 | 0.9166 | 2.0534 | Endosomal transport, lipid transport, fatty acid beta-oxidation |
| At2g27600 | UDP-glucuronosyl/UDP-glucosyl transferase family protein contains Pfam profile: PF00201 UDP-glucuronosyl and UDP-glucosyl transferase                                                                                                                           | 1.029  | 0.9004 | 2.2814 |                                                                 |
| At2g29750 | Nodulin mtn21 family protein similar to mtn21 Gl:2598575 (root nodule development) from [Medicago truncatula]                                                                                                                                                   | 0.9777 | 1.1907 | 2.7215 | Iron starvation, nitrate transport, cell root differentiation   |
| At2g39510 | Cytochrome P450 family protein similar to cytochrome P450 93A1 (SP:Q42798)                                                                                                                                                                                      | 1.5245 | 1.2307 | 2.1967 | --                                                              |
| At2g42250 | [Glycine max]                                                                                                                                                                                                                                                   | 0.9391 | 1.1    | 2.1655 | Oxidation-reduction process                                     |
|           | T-complex protein 1 alpha subunit / TCP-1-alpha / chaperonin (CCT1) identical to SWISS-PROT:P28769- T-complex protein 1, alpha subunit (TCP-1-alpha)                                                                                                            |        |        |        | Cytoskeleton organization, RNA methylation, protein metabolism  |
| At3g20050 | [Arabidopsis thaliana]                                                                                                                                                                                                                                          | 1.4807 | 0.657  | 2.2397 |                                                                 |
| At3g28150 | Expressed protein                                                                                                                                                                                                                                               | 1.2303 | 1.1593 | 2.0143 | Carbohydrate metabolism                                         |
| At3g28350 | Hypothetical protein                                                                                                                                                                                                                                            | 1.1961 | 1.0934 | 2.0949 | ---                                                             |
|           | Scarecrow transcription factor family protein scarecrow-like 11 - Arabidopsis thaliana, EMBL:AF036307                                                                                                                                                           |        |        |        | Oxidation-reduction process                                     |
| At3g46600 | Glycosyl hydrolase family 3 protein beta-D-glucan exohydrolase, Nicotiana tabacum,                                                                                                                                                                              | 1.0472 | 0.8991 | 2.3635 |                                                                 |
| At3g47050 |                                                                                                                                                                                                                                                                 | 0.8134 | 1.4756 | 2.0458 | Carbohydrate metabolism                                         |

|           |                                                                                                                                                                                                                                                                 |        |        |        |                                                          |
|-----------|-----------------------------------------------------------------------------------------------------------------------------------------------------------------------------------------------------------------------------------------------------------------|--------|--------|--------|----------------------------------------------------------|
| At3g52820 | TREMBL:AB017502_1<br>Purple acid phosphatase (PAP22) identical to purple acid phosphatase (PAP22)GI:20257494 from [Arabidopsis thaliana]                                                                                                                        | 0.8651 | 1.3859 | 2.5724 | Cellular response to Pi starvation                       |
| At3g57520 | Alkaline alpha galactosidase, putative similar to alkaline alpha galactosidase II [Cucumis melo] GI:29838631; contains Pfam profile PF05691: Raffinose synthase or seed imbibition protein Sip1                                                                 | 1.415  | 0.8368 | 2.1679 | Carbohydrate metabolism, oxidative stress                |
| At3g60550 | Cyclin family protein similar to cyclin 2 [Trypanosoma brucei] GI:7339572, cyclin 6 [Trypanosoma cruzi] GI:12005317; contains Pfam profile PF00134: Cyclin, N-terminal domain                                                                                   | 1.0758 | 1.2071 | 2.6179 | Cell cycle                                               |
| At4g15630 | Integral membrane family protein contains TIGRFAM TIGR01569 : plant integral membrane protein TIGR01569; contains Pfam PF04535 : Domain of unknown function (DUF588)                                                                                            | 0.7925 | 1.154  | 2.4257 | ---                                                      |
| At4g38220 | Aminoacylase, putative / N-acyl-L-amino-acid amidohydrolase, putative similar to aminoacylase-1 (N-acyl-L-amino-acid amidohydrolase, ACY-1)[Homo sapiens] SWISS-PROT:Q03154                                                                                     | 1.4328 | 1.3394 | 2.3245 | Protein metabolism, response to zinc ion                 |
| At5g01220 | UDP-sulfoquinovose:DAG sulfoquinovosyltransferase / sulfolipid synthase (SQD2) identical to GI:20302857                                                                                                                                                         | 1.1487 | 0.8449 | 2.7589 | Cellular response to Pi starvation                       |
| At5g09860 | Nuclear matrix protein-related low similarity to nuclear matrix protein p84 [Homo sapiens] GI:550058                                                                                                                                                            | 1.1899 | 1.123  | 2.2289 | RNA metabolism                                           |
| At5g13680 | IKI3 family protein weak similarity to SP O95163 ikappab kinase complex-associated protein (IKK complex-associated protein) (p150) (Homo sapiens); contains Pfam profile PF04762: IKI3 family                                                                   | 1.4893 | 1.0278 | 2.3403 | Cell proliferation, response to ABA and oxidative stress |
| At5g15180 | Peroxidase, putative similar to peroxidase ATP12a [Arabidopsis thaliana] gi 1429217 emb CAA67311                                                                                                                                                                | 0.8084 | 0.7798 | 2.2551 | Oxidation-reduction process                              |
| At5g20790 | Expressed protein predicted protein, Arabidopsis thaliana                                                                                                                                                                                                       | 0.8237 | 1.1518 | 2.2024 | ---                                                      |
| At5g44020 | Acid phosphatase class B family protein similar to SPIP15490 STEM 28 kda glycoprotein precursor (Vegetative storage protein A) (Glycine max), acid phosphatase [Glycine max] GI:3341443; contains Pfam profile PF03767: HAD superfamily (subfamily IIIB) phosph | 0.8098 | 0.9019 | 2.1261 |                                                          |
| At5g54680 | Basic helix-loop-helix (bhlh) family protein similar to unknown protein (pir  B71406)                                                                                                                                                                           | 0.9241 | 1.0171 | 2.7488 | Transcription                                            |
| At5g60850 | Dof-type zinc finger domain-containing protein similar to zinc finger protein OBP4 gi:5059396 from [Arabidopsis thaliana]; EMBL:AF155817                                                                                                                        | 1.0971 | 1.1676 | 2.2409 | Transcription                                            |
| At5g63570 | Glutamate-1-semialdehyde 2,1-aminomutase 1 (GSA 1) / glutamate-1-semialdehyde aminotransferase 1 (GSA-AT 1) identical to GSA 1 [SPIP42799]                                                                                                                      | 1.2606 | 1.1754 | 2.8875 | Aromatic amino acid biosynthesis, cell differentiation   |
| At5g65207 | Expressed protein                                                                                                                                                                                                                                               | 0.751  | 0.871  | 2.8645 | ---                                                      |

#### DOW-REGULATED GENES

| ID (array)     | Description                                                                             | Expression ratio |        |        | Biological process involved |
|----------------|-----------------------------------------------------------------------------------------|------------------|--------|--------|-----------------------------|
|                |                                                                                         | 10 min           | 30 min | 2 h    |                             |
| <b>Group I</b> |                                                                                         |                  |        |        |                             |
| At1g06750      | Hypothetical protein                                                                    | 0.4815           | 0.6013 | 0.738  | Cell wall modification      |
| At1g12540      | Basic helix-loop-helix (bhlh) family protein contains Pfam profile: PF00010 helix-loop- | 0.4825           | 1.0873 | 0.8914 | Transcription               |

|           |                                                                                                                                                                                                                                                                                                                               |        |        |        |                                                                                          |
|-----------|-------------------------------------------------------------------------------------------------------------------------------------------------------------------------------------------------------------------------------------------------------------------------------------------------------------------------------|--------|--------|--------|------------------------------------------------------------------------------------------|
| At1g29460 | helix DNA-binding domain<br>Auxin-responsive protein, putative similar to auxin-induced protein 6B (SP:P33083)<br>[Glycine max]                                                                                                                                                                                               | 0.346  | 1.0293 | 0.8982 | Response to auxin stimulus                                                               |
| At1g52790 | Oxidoreductase, 2OG-Fe(II) oxygenase family protein similar to GS-AOP loci<br>[GI:16118889, GI:16118887, GI:16118891, GI:16118893]; contains PF03171 2OG-Fe(II) oxygenase superfamily domain                                                                                                                                  | 0.3966 | 1.0589 | 0.7218 | Oxidation-reduction process                                                              |
| At1g56270 | Hypothetical protein                                                                                                                                                                                                                                                                                                          | 0.4308 | 1.0735 | 1.0735 | ---                                                                                      |
| At1g63105 | Hypothetical protein                                                                                                                                                                                                                                                                                                          | 0.4668 | 0.9165 | 0.9107 | ---                                                                                      |
| At1g66640 | Expressed protein                                                                                                                                                                                                                                                                                                             | 0.4089 | 1.3264 | 0.9445 | ---                                                                                      |
| At1g69610 | Expressed protein                                                                                                                                                                                                                                                                                                             | 0.4783 | 1.0476 | 0.8177 | Protein metabolism                                                                       |
| At1g70260 | Nodulin mtn21 family protein contains similarity to mtn21 [Medicago truncatula]<br>GI:2598575; contains Pfam profile PF00892: Integral membrane protein                                                                                                                                                                       | 0.4231 | 0.862  | 0.7688 | ---                                                                                      |
| At1g70960 | F-box family protein contains Pfam PF00646: F-box domain; contains TIGRFAM<br>TIGR01640: F-box protein interaction domain                                                                                                                                                                                                     | 0.4342 | 0.8453 | 0.5789 | ---                                                                                      |
| At1g76620 | Expressed protein contains Pfam profile PF04784: Protein of unknown function,<br>DUF547                                                                                                                                                                                                                                       | 0.488  | 1.0653 | 0.9654 | ---                                                                                      |
| At1g77655 | Expressed protein                                                                                                                                                                                                                                                                                                             | 0.4055 | 1.2536 | 0.8027 | ---                                                                                      |
| At1g78915 | Expressed protein                                                                                                                                                                                                                                                                                                             | 0.362  | 0.829  | 0.939  | ---                                                                                      |
| At2g03770 | Sulfotransferase family protein similar to steroid sulfotransferase 3 [Brassica napus]<br>GI:3420008; contains Pfam profile PF00685: Sulfotransferase domain                                                                                                                                                                  | 0.4796 | 0.9117 | 0.855  | Flavonoid metabolism                                                                     |
| At2g04800 | Expressed protein                                                                                                                                                                                                                                                                                                             | 0.4227 | 1.112  | 0.7233 | Protein metabolism, response to iron<br>starvation and transport, response to<br>nitrate |
| At2g06630 | Hypothetical protein similar to At2g12120, At1g45090, At2g05470, At5g28482<br>Seven transmembrane MLO family protein / MLO-like protein 7 (MLO7) identical to<br>membrane protein Mlo7 [Arabidopsis thaliana] gi 14091584 gb AAK53800; similar to<br>MLO protein SWISS-PROT:P93766, NCBI_gi:1877221 [Hordeum vulgare][Barley] | 0.498  | 0.8734 | 0.7775 | Transposon, cell death<br>Cell death, pollen tube reception                              |
| At2g17430 | Leucine-rich repeat family protein contains leucine rich-repeat (LRR) domains<br>Pfam:PF00560, INTERPRO:IPR001611; contains similarity to disease resistance<br>protein [Lycopersicon esculentum] gi 3894383 gb AAC78591                                                                                                      | 0.3871 | 0.6384 | 0.8699 | Signal transduction                                                                      |
| At2g25470 | Hypothetical protein contains Pfam profile PF03080: Arabidopsis proteins of<br>unknown function                                                                                                                                                                                                                               | 0.4918 | 1.0168 | 0.8146 | ---                                                                                      |
| At2g27320 | Leucine-rich repeat protein kinase, putative similar to light repressible receptor<br>protein kinase [Arabidopsis thaliana] gi 1321686 emb CAA66376; contains leucine<br>rich repeat (LRR) domains, Pfam:PF00560; contains protein kinase domain,<br>Pfam:PF00069                                                             | 0.468  | 1.1177 | 0.8169 | ATP binding, response to iron<br>starvation, kinase activity                             |
| At2g28960 | Protein kinase family protein contains protein kinase domain, Pfam:PF00069                                                                                                                                                                                                                                                    | 0.4938 | 0.8409 | 0.9565 | Kinase activity                                                                          |
| At2g42630 | F-box family protein-related contains TIGRFAM TIGR01640: F-box protein interaction<br>domain                                                                                                                                                                                                                                  | 0.4948 | 1.0771 | 0.9031 | ---                                                                                      |
| At3g23420 | Expressed protein                                                                                                                                                                                                                                                                                                             | 0.4126 | 1.03   | 0.9925 | ---                                                                                      |
| At3g27410 | Expressed protein                                                                                                                                                                                                                                                                                                             | 0.3549 | 0.818  | 0.8513 | ---                                                                                      |
| At3g50760 | Glycosyl transferase family 8 protein contains Pfam profile: PF01501 Glycosyl<br>transferase family 8                                                                                                                                                                                                                         | 0.4966 | 0.9449 | 0.9442 | Carbohydrate metabolism, JA,<br>biosynthesis, response to fungus and<br>wounding         |
| At4g05630 | Expressed protein                                                                                                                                                                                                                                                                                                             | 0.3084 | 0.8873 | 0.8243 | ---                                                                                      |
| At4g08130 | Hypothetical protein                                                                                                                                                                                                                                                                                                          | 0.4449 | 0.8513 | 0.5458 | ---                                                                                      |
| At4g14250 | UBX domain-containing protein low similarity to 60S ribosomal protein L2 [Nicotiana<br>tabacum] GI:9230281; contains Pfam profile PF00789: UBX domain                                                                                                                                                                         | 0.4197 | 0.8489 | 0.8785 | Ubiquitination                                                                           |
| At4g14290 | Expressed protein contains Interpro entry IPR000379                                                                                                                                                                                                                                                                           | 0.3009 | 0.739  | 0.6914 | Response to abiotic stress                                                               |

|           |                                                                                                                                                                                                                                                                 |        |        |        |                                                |
|-----------|-----------------------------------------------------------------------------------------------------------------------------------------------------------------------------------------------------------------------------------------------------------------|--------|--------|--------|------------------------------------------------|
| At4g15100 | Serine carboxypeptidase S10 family protein similar to Serine carboxypeptidase II chains A and B (SP:P08819) (EC 3.4.16.6) [Triticum aestivum (Wheat)]                                                                                                           | 0.4959 | 1.1485 | 0.7751 | Proteolysis, response to fungus                |
| At4g25400 | Basix helix-loop-helix (bhlh) family protein contains Pfam profile: PF00010 helix-loop-helix DNA-binding domain                                                                                                                                                 | 0.4833 | 0.7922 | 0.9993 | Transcription                                  |
| At4g32915 | Expressed protein                                                                                                                                                                                                                                               | 0.4814 | 0.8529 | 1.1052 | Translation fidelity                           |
| At4g35150 | O-methyltransferase family 2 protein similar to caffeic acid O-methyltransferase, Pinus taeda, gb:U39301                                                                                                                                                        | 0.4855 | 0.7486 | 0.8236 | Phenylpropanoid metabolism, response to fungus |
| At5g03600 | GDSL-motif lipase/hydrolase family protein low similarity to family II lipase EXL3 [Arabidopsis thaliana] GI:15054386; contains Pfam profile PF00657: GDSL-like Lipase/Acylhydrolase                                                                            | 0.3057 | 1.284  | 1.1004 | Lipid metabolism                               |
| At5g10000 | Ferredoxin family protein similar to Ferredoxin, chloroplast precursor from Arabidopsis thaliana [SP P16972]; contains Pfam profile: PF00111 2Fe-2S iron-sulfur cluster binding domains                                                                         | 0.4305 | 0.8125 | 0.8671 | Electron transport, tolerance to water stress  |
| At5g22110 | DNA polymerase epsilon subunit B family contains Pfam profile: PF04042 DNA polymerase epsilon subunit B                                                                                                                                                         | 0.4779 | 0.9252 | 0.9548 | Transcription                                  |
| At5g25990 | Expressed protein contains Pfam profile PF03267: Arabidopsis protein of unknown function, DUF266; expression supported by MPSS                                                                                                                                  | 0.338  | 0.9857 | 0.8289 | Carbohydrate metabolism                        |
| At5g37910 | Seven in absentia (SINA) family protein similar to SIAH1 protein [Brassica napus var. Napus] GI:7657876; contains Pfam profile PF03145: Seven in absentia protein family                                                                                        | 0.3817 | 0.7278 | 0.8343 | Ubiquitination                                 |
| At5g38320 | Expressed protein ; expression supported by MPSS                                                                                                                                                                                                                | 0.312  | 0.998  | 0.7281 | ---                                            |
| At5g38810 | F-box family protein predicted proteins, Arabidopsis thaliana                                                                                                                                                                                                   | 0.4925 | 0.7123 | 0.6849 | ---                                            |
| At5g46090 | Expressed protein contains Pfam profile PF05078: Protein of unknown function (DUF679); expression supported by MPSS                                                                                                                                             | 0.4617 | 0.8625 | 1.2554 | ---                                            |
| At5g48100 | Laccase family protein / diphenol oxidase family protein similar to laccase [Pinus taeda][GI:13661197]                                                                                                                                                          | 0.4369 | 1.013  | 0.8338 | Carbohydrate metabolism                        |
| At5g53520 | Oligopeptide transporter OPT family protein similar to SPIP40900 Sexual differentiation process protein isp4 (Schizosaccharomyces pombe), oligopeptide transporter Opt1p [Candida albicans] GI:2367386; contains Pfam profile PF03169: OPT oligopeptide transpo | 0.4717 | 0.9981 | 0.813  | ---                                            |
| At5g62830 | F-box family protein-related similar to F-box protein family, atfbx9 (GI:20197985) [Arabidopsis thaliana]; contains TIGRFAM TIGR01640 : F-box protein interaction domain                                                                                        | 0.4744 | 1.0579 | 0.7949 | Ubiquitination                                 |
| At5g62830 | Mirna gene Arabidopsis thaliana mir395f stem-loop                                                                                                                                                                                                               | 0.4064 | 1.3782 | 0.9203 | Respond to Pi and sulfate starvation           |
| At5g46730 | Glycine-rich protein                                                                                                                                                                                                                                            | 0.3734 | 0.4086 | 0.6978 | Cell elongation, respond to pathogens          |

## Group II

|           |                                                                                                                                                                                                                    |        |        |        |                                                              |
|-----------|--------------------------------------------------------------------------------------------------------------------------------------------------------------------------------------------------------------------|--------|--------|--------|--------------------------------------------------------------|
| At1g11210 | Expressed protein contains similarity to cotton fiber expressed protein 1 [Gossypium hirsutum] gi 3264828 gb AAC33276                                                                                              | 1.0381 | 0.3689 | 0.7753 | Respond to ABA, cold, oxidative stress and water deprivation |
| At1g64170 | Cation/hydrogen exchanger, putative (CHX16) monovalent cation:proton antiporter family 2 (CPA2) member, PMID:11500563                                                                                              | 0.7013 | 0.3702 | 1.3109 | Cation transport                                             |
| At2g02120 | Plant defensin-fusion protein, putative (PDF2.1) plant defensin protein family member, personal communication, Bart Thomma (Bart.Thomma@agr.kuleuven.ac.be); contains a gamma-thionin family signature (PDOC00725) | 0.7873 | 0.2353 | 0.7105 | Defensin                                                     |
| At2g23030 | Protein kinase, putative similar to protein kinase 3 [Glycine max] GP 310582 gb AAB68961                                                                                                                           | 1.018  | 0.4512 | 1.4254 | Iron starvation, nitrate transport, respond to               |

|                  |                                                                                                                                                                                                                                                                              |        |        |        |                                                          |
|------------------|------------------------------------------------------------------------------------------------------------------------------------------------------------------------------------------------------------------------------------------------------------------------------|--------|--------|--------|----------------------------------------------------------|
| At2g29310        | Tropinone reductase, putative / tropine dehydrogenase, putative similar to tropinone reductase SP:P50165 from [Datura stramonium]                                                                                                                                            | 0.6255 | 0.4518 | 0.6836 | osmotic stress                                           |
| At2g38465        | Expressed protein                                                                                                                                                                                                                                                            | 0.8395 | 0.4115 | 0.7629 | Oxidation-reduction process                              |
| At2g40080        | Expressed protein                                                                                                                                                                                                                                                            | 1.0768 | 0.278  | 0.8084 | ---                                                      |
| At3g13130        | Hypothetical protein                                                                                                                                                                                                                                                         | 0.7882 | 0.4131 | 0.7214 | Photoperiodism                                           |
| At3g13160        | Pentatricopeptide (PPR) repeat-containing protein contains Pfam profile PF01535: PPR repeat                                                                                                                                                                                  | 1.0589 | 0.4741 | 0.7293 | ---                                                      |
| At3g15500        | No apical meristem (NAM) family protein (NAC3) identical to atnac3 [Arabidopsis thaliana] GI:12060424; contains Pfam PF02365: No apical meristem (NAM) domain;                                                                                                               | 1.103  | 0.4661 | 0.6747 | MAPK cascade, ABA signaling, defense to fungus, salt, JA |
| At3g15630        | Expressed protein similar to jasmonic acid 2 GB:AAF04915 from [Lycopersicon esculentum]                                                                                                                                                                                      | 0.9647 | 0.4714 | 1.045  | biosynthesis                                             |
| At3g48360        | Speckle-type POZ protein-related contains Pfam PF00651 : BTB/POZ domain; similar to Speckle-type POZ protein (SP:O43791) [Homo sapiens]                                                                                                                                      | 0.9779 | 0.4926 | 1.2816 | ---                                                      |
| At4g22660        | F-box family protein contains Pfam PF00646: F-box domain; similar to F-box protein family, atfbx7 (GI:20197899) [Arabidopsis thaliana]                                                                                                                                       | 0.9168 | 0.4921 | 0.7716 | Respond to ABA and auxins, JA, SA, salt, and wounding    |
| At5g24470        | Pseudo-response regulator 5 (APRR5) identical to pseudo-response regulator 5 GI:10281006 from [Arabidopsis thaliana]                                                                                                                                                         | 1.0605 | 0.4512 | 1.1884 | ---                                                      |
| <b>Group III</b> |                                                                                                                                                                                                                                                                              |        |        |        |                                                          |
| At1g11530        | Thioredoxin family protein similar to thioredoxin H-type from Arabidopsis thaliana SP P29448, Nicotiana tabacum SP Q07090; contains Pfam profile: PF00085                                                                                                                    | 0.811  | 0.8014 | 0.4088 | Cell redox homeostasis                                   |
| At1g16120        | Thioredoxin                                                                                                                                                                                                                                                                  |        |        |        |                                                          |
| At1g16250        | Wall-associated kinase, putative contains similarity to wall-associated kinase 4 GI:3355308 from [Arabidopsis thaliana]                                                                                                                                                      | 0.7772 | 0.6796 | 0.4277 | Protein phosphorylation                                  |
| At1g18010        | Kelch repeat-containing F-box family protein contains Pfam profiles PF01344: Kelch motif, PF00646: F-box domain                                                                                                                                                              | 0.7406 | 0.836  | 0.3495 | ---                                                      |
| At1g23120        | Expressed protein contains 11 transmembrane domains; Major latex protein-related / MLP-related low similarity to major latex protein {Papaver somniferum}[GI:294060]; Location of EST gb T88564 ; contains Pfam profile PF00407: Pathogenesis-related protein Bet v I family | 1.0504 | 1.2336 | 0.4385 | Transmembrane transport                                  |
| At1g36640        | Expressed protein                                                                                                                                                                                                                                                            | 0.9728 | 0.746  | 0.3071 | Responds to biotic stimulus                              |
| At1g43160        | AP2 domain-containing protein RAP2.6 (RAP2.6) identical to AP2 domain containing protein RAP2.6 GI:2281637 from [Arabidopsis thaliana]                                                                                                                                       | 0.9172 | 1.4339 | 0.3729 | Celular response to heat, JA, cold, fungus, SA, and salt |
| At1g52325        | Hypothetical protein                                                                                                                                                                                                                                                         | 0.9154 | 0.7813 | 0.2853 | Translation                                              |
| At1g61480        | S-locus protein kinase, putative similar to receptor protein kinase (IRK1) GI:836953 from [Ipomoea trifida]; contains S-locus glycoprotein family domain, Pfam:PF00954                                                                                                       | 0.9038 | 1.0583 | 0.4626 | Protein phosphorylation                                  |
| At1g74590        | Glutathione S-transferase, putative similar to putative glutathione S-transferase GB:CAA10060 [Arabidopsis thaliana]; contains Pfam profile: PF00043 Glutathione S-transferases                                                                                              | 1.1765 | 0.8633 | 0.4997 | Toxin catabolism process                                 |
| At1g77010        | Pentatricopeptide (PPR) repeat-containing protein contains INTERPRO:IPR002885 PPR repeats                                                                                                                                                                                    | 0.8361 | 0.9247 | 0.4554 | ---                                                      |
| At1g79720        | Aspartyl protease family protein contains Pfam domain, PF00026: eukaryotic aspartyl protease                                                                                                                                                                                 | 1.1039 | 0.9225 | 0.364  | Proteolysis                                              |



|           |                                                                                                                                                                                                                                                                 |        |        |        |                                                                      |
|-----------|-----------------------------------------------------------------------------------------------------------------------------------------------------------------------------------------------------------------------------------------------------------------|--------|--------|--------|----------------------------------------------------------------------|
| At2g07671 | H <sup>+</sup> -transporting two-sector ATPase, C subunit family protein similar to ATPase subunit 9 [Arabidopsis thaliana] GI:15215920; contains Pfam profile PF00137: ATP synthase subunit C                                                                  | 1.0194 | 1.6448 | 0.3983 | Ion transport                                                        |
| At2g25950 | Expressed protein                                                                                                                                                                                                                                               | 1.0998 | 1.305  | 0.454  | Possible proteasome interaction                                      |
| At2g36890 | Myb family transcription factor (MYB38) contains Pfam profile: PF00249 myb-like DNA-binding domain                                                                                                                                                              | 0.8841 | 1.4023 | 0.4202 | Transcription                                                        |
| At2g38870 | Protease inhibitor, putative similar to SP P24076 Glu S.griseus protease inhibitor (BGIA) (Momordica charantia); contains Pfam profile PF00280: Potato inhibitor I family                                                                                       | 1.1226 | 0.9532 | 0.4252 | Defense responses to fungus and wounding, proline transport          |
| At2g41120 | Expressed protein                                                                                                                                                                                                                                               | 0.9639 | 1.302  | 0.4204 | ---                                                                  |
| At2g42720 | F-box family protein contains F-box domain Pfam:PF00646                                                                                                                                                                                                         | 0.9085 | 1.2364 | 0.4508 | DNA metabolism                                                       |
| At2g46510 | Basic helix-loop-helix (bhlh) family protein contains Pfam profile: PF00010 helix-loop-helix DNA-binding domain                                                                                                                                                 | 1.2193 | 1.0399 | 0.4966 | ABA, auxin, ethylene signaling, responses to fungus and water stress |
| At3g03880 | Expressed protein                                                                                                                                                                                                                                               | 0.7938 | 1.0566 | 0.3964 | ---                                                                  |
| At3g10110 | Mitochondrial import inner membrane translocase subunit Tim17/Tim22/Tim23 family protein weak similarity to TIM22 preprotein translocase [Rattus norvegicus] GI:6760457; contains Pfam profile PF02466: Mitochondrial import inner membrane translocase subunit | 1.1191 | 0.8471 | 0.4854 | Protein metabolism                                                   |
| At3g13940 | Expressed protein weak similarity to DNA-directed RNA polymerase I 49 kda polypeptide (EC 2.7.7.6) (A49) (Swiss-Prot:O14086) [Schizosaccharomyces pombe]; similar to Nuclear pore complex protein Nup107 (Nucleoporin Nup107) (107 kda nucleoporin) (p105) (Swi | 1.6065 | 1.4468 | 0.4626 | Transcription                                                        |
| At3g28610 | AAA-type ATPase family protein contains Pfam profile: ATPase family PF00004                                                                                                                                                                                     | 0.6392 | 0.9056 | 0.3697 | Import to nucleous                                                   |
| At3g60620 | Phosphatidate cytidyltransferase family protein contains Pfam profile: PF01148 phosphatidate cytidyltransferase                                                                                                                                                 | 1.1392 | 1.2467 | 0.4604 | Phospholipid metabolism                                              |
| At4g15730 | Expressed protein                                                                                                                                                                                                                                               | 1.1551 | 0.6393 | 0.4773 | Ion binding                                                          |
| At4g19170 | 9-cis-epoxycarotenoid dioxygenase, putative / neoxanthin cleavage enzyme, putative / carotenoid cleavage dioxygenase, putative similar to 9-cis-epoxycarotenoid dioxygenase [Phaseolus vulgaris][GI:6715257]; neoxanthin cleavage enzyme, Lycopersicon esculent | 1.0226 | 1.1053 | 0.3587 | Anthocyanin biosynthesis                                             |
| At4g36580 | AAA-type ATPase family protein contains Pfam domain, PF00004: ATPase, AAA family (ATPases associated with diverse cellular activities)                                                                                                                          | 1.1735 | 0.8415 | 0.4563 | Development                                                          |
| At5g37730 | Expressed protein                                                                                                                                                                                                                                               | 1.0504 | 0.6247 | 0.3514 | ---                                                                  |
| At5g46380 | Hypothetical protein                                                                                                                                                                                                                                            | 0.8741 | 1.0426 | 0.3808 | ---                                                                  |
| At5g54220 | Hypothetical protein                                                                                                                                                                                                                                            | 0.8204 | 1.0874 | 0.4584 | Cell fate specification                                              |
