# Supplementary material for: An improved, low-cost, hydroponic system for growing Arabidopsis and other plant species under aseptic conditions
Source: PubMed Central journal article supplement (PMC3999955; doi:10.1186/1471-2229-14-69), 2014-03-21
Supplement: 1471-2229-14-69-S4.pdf [file 1471-2229-14-69-S4.pdf]

**Additional file 4.** qRT-PCR primers used in this study

| <b>Locus</b> | <b>Oligonucleotide name</b> | <b>Oligonucleotide sequence (5'-3')</b>                      |
|--------------|-----------------------------|--------------------------------------------------------------|
| AT4G28610    | PHR1FW<br>PHR1RW            | aaaccaacccggcgattca<br>agcgggtgtcaacttcctttctgg              |
| AT3G25710    | BHLH32FW<br>BHLH32RW        | gttcgggtcaaactgttctctg<br>tatcgcttaggccttcgcct               |
| AT2G33770    | PHO2FW<br>PHO2RW            | ctcatgagccaccaatggatcat<br>tcggccaactgcttatcata              |
| At5g23630    | Pdr2FW<br>Pdr2RW            | ggagcactgaagcaggcccatgtt<br>ttgaacatctgaagagtcgtcacaagt      |
| AT5G13080    | WRKY75FW<br>WRKY75RW        | atgggtcgttgatgctcct<br>cacctatagtaactcctaggg                 |
| AT1G23010    | LPR1FW<br>LPR1RW            | tcagggactacagaggtatggga<br>acctaagcggcctcatcat               |
| AT5G20150    | SPX1FW<br>SPX1REV           | tcctgctaacgaaactgagtct<br>ggcggcaatgaaaacacact               |
| AT3G05630    | PLDZ2FW<br>PLDZ2REV         | cgaatgaacatatacgctcaagagctg<br>agcagtgaaagtagaactcgactgagg   |
| AT3G18780    | ACT2FW<br>ACT2REV           | gaattgtctcgttgctcctcac<br>tgcaaatccagccttaccatac             |
| AT5G55840    | PPRFW<br>PPRREV             | tgcgactacatacaaagcttcatcag<br>tgttacttgcaaggccttcagcttc      |
| AT3G53090    | UBHECTFW<br>UBHECTREV       | cggtgctacaatacttcttaagctccaac<br>agaggtctctacgagagttcaaatcct |
